# Supplementary material for: Dimeric iron n-confused porphyrin complexesElectonic supplementary information (ESI) available: general information; preparation and crystal data for 6 and 7; Fig. S1: absorption spectra for 6 and 7; Figs. S2 and S3: magnetic susceptibility data for 6 and 7. See http://www.rsc.org/suppdata/cc/b2/b202679a/
Source: Royal Society of Chemistry journal article supplement (doi:10.1039/b202679a), 2002-06-13
Supplement: b202679a.doc [file b202679a.doc]

Supplementary Material (ESI) for Chemical Communications

This journal is © The Royal Society of Chemistry 2002

Dimeric Iron N-Confused Porphyrin

**Contents**

General information

Preparation of [Fe(NCTPP)]2 (**6**)

Preparation of [Fe(ONCTPP)]2(OH)•Na(THF)2 (**7**)

Absorption spectra of [FeII(NCTPP)]2 (**6**) and [Fe(NCOTPP)]2(OH)•Na(THF)2 (**7**) (Supporting Figure 1)

SQUID magnetic susceptibility data for [Fe(NCTPP)]2 (**6**) (Supporting Figure 2)

SQUID magnetic susceptibility data for [Fe(NCOTPP)]2­(OH)•Na(THF)2 (**7**) (Supporting Figure 3)

Crystal structure report for **6**

Crystal structure report for **7**

**­___________________________________________________________________________**

**General Information**

Manipulations, reactions and transfers of samples were conducted under nitrogen in an inert atmosphere dry box or according to standard Schlenk techniques. For inert-atmosphere operation, solvents were dried, distilled, and degassed using standard techniques. Pyrrole was fresh distilled from calcium hydride before use. Otherwise all starting materials were obtained commercially and used without further purification. UV-Vis spectra were recorded on a Hewlett Packard 8453 spectrophotometer. Analysis of carbon, hydrogen and nitrogen were obtained with a CHN analyzer (Heraeus). Magnetic susceptibility data were recorded on a Quantum Design MPMS5 5 T SQUID magnetometer. The SQUID results were obtained with a field of 10000 G.

**Preparation of [Fe(NCTPP)]2 (6).**  A 50 mL vessel charged with a THF(20 mL) solution of Fe(NCTPP)Br (50 mg, 0.067 mmol) was added with NaSePh (15 mg, 0.084 mmol) in an inner atmosphere dry box. The solution was heated to 60° C and continuously stirred under nitrogen. After 6 h, the solution was cool down to room temperature and the solution was concentrated to about 5 ml under vacuum. The excess NaSePh and any precipitated salt were removed by filter the solution through celite. After dry the solution under vacuum, the solid was redissolved in 10 mL of CH2Cl2 and filter through celite. The solution was dried under vacuum and redissolved in 5:1 of THF/CH2Cl2 and diffused with n-hexane. Chunky dark green solid crystallized out from the solution and the solid was collected and washed with hexane to have 76 mg of [Fe(NCTPP)]2. (85.2 %) A crystal suit for X-ray crystal analysis was picked directly from the vial and seal with epoxy glue immediately. [Fe(NCTPP)]2: Absorption spectrum (CH­2Cl2) [max, nm (log , M-1 cm-1)]: 459(4.62), 755(3.93). Anal. Calcd for Fe2C44H56N8 •2THF•1.5CH2Cl2: N, 6.96; C, 72.79; H, 4.69. Found: N, 6.82; C, 72.88; H, 4.56.

**Preparation of [Fe(ONCTPP)]2(OH)•Na(THF)2 (7).**  In a 50 ml flask charged with 20 mL THF was added with Fe(NCTPP)Br (50 mg, 0.067 mmol) and NaSePh (60 mg, 0.335 mmol) in an inert atmosphere dry box. The solution was stirred at 60° in dry box and cooling to room temperature after 24 h. A UV-vis spectrum of λmax at 455 nm with pattern similar to **6** was observed. The reaction flask was then taken out from dry box and exposed to air for about 1 min with stirring at room temperature. The λmax of UV-vis shifted rapidly from 455 to 389 nm within 5 min. The solution was stirred continuously for another hour. The solvent was then removed under vacuum and the yellow-brownish solid was sent into box and dissolved in 15 mL of 5:1 THF/CH2Cl2. The solution was filtered through celite, concentrated to about 5 ml and layer with n-hexane. Crystals formed after several days were collected and washed with hexane to have 74 mg of [Fe(ONCTPP)]2(OH)•Na(THF)2. (72 % yield) [Fe(NCOTPP)]2(OH)•Na(THF)2: Absorption spectrum (CH­2Cl2) [max, nm (log , M-1 cm-1)]: 389(4.83). Anal. Calcd for Fe2O5C96N8H71Na1•2CH2Cl2: N, 6.51; C, 68.39; H, 4.39. Found: N, 6.46; C, 68.57; H, 4.03.

**X-ray Analysis of the Structures of 6 and 7**

Diffraction measurements were carried out at 295(2) K on a Bruker SMART 1000 CCD diffractometer with graphite-monochromated Mo K radiation ( = 0.7107 Å). Least-squares refinement of the positional and anisotropic thermal parameters for the contribution of all non-hydrogen atoms and fixed hydrogen atoms was based on *F*2. A SADABS absorption correction was made. The SHELXTL structural refinement program was employed.

**6**: The crystal suits for structure analysis measured 0.36 x 0.27 x 0.08 mm3 which was grown from a slow diffusion of hexane into the THF/CH2­Cl2­ solution of **6** in an inert-atmosphere anaerobic dry box. **6** crystallized in monoclinic unit cell, space group Pbca, *a* =15.867(5) Å, *b* = 20.697 (6) Å, *c* = 22.397(7) Å,=90, ** =90, =90 *V* = 7355(4) Å 3, Z = 4, *Dc* = 1.338 Mg/m-3,  = 0.71073 Å, **= 0.454 mm-1, *F*(000) = 3088. Data were collected for 1.82 < ** < 27.67. The structure was solved by direct method and refined by least square against *F*2 to *R*1 = 0.0756 (w*R*2 = 0.1546) and *S*goof = 0.983.

**7**: The crystal suits for structure analysis measured 0.38 x 0.14 x 0.10 mm3 which was grown from a slow diffusion of hexane into the THF/CH2­Cl2­ solution of **7** in an inert-atmosphere anaerobic dry box. **7** crystallized in monoclinic unit cell, space group C2/c, *a* = 28.473(3) Å, *b* = 18.7702(18) Å, *c* = 16.8963(16) Å,**= 90, **= 104.922(2), **= 90 , *V* = 8725.6(14) Å 3, Z = 4, *Dc* = 1.346 Mg/m-3,  = 0.71073 Å,** = 0.404 mm-1, *F*(000) = 3704. Data were collected for 1.31 < ** < 25.02. The structure was solved by direct method and refined by least square against *F*2 to *R*1 = 0.0702 (w*R*2 = 0.1815) and *S*goof = 0.924.

**Supporting Figure 1.** Absorption spectrum for [Fe(NCTPP)]2 (**6**) (solid line) and [Fe(ONCTPP)]2(OH)•Na(THF)2 (**7**)(dotted line)

**Supporting Figure 2.** SQUID magnetic susceptibility data for [Fe(NCTPP)]2 (**6**)

**Supporting Figure 3.** SQUID magnetic susceptibility data for [Fe(NCOTPP)]2(OH)•Na(THF)2 **(7).**

Crystal Structure Report for [Fe(NCTPP)]2 (**6**)

**Table 1.** Crystal data and structure refinement.

**Table 2.**  Atomic coordinates ( x 104) and equivalent isotropic displacement parameters (Å2x 103).

**Table 3.**  Bond lengths [Å] and angles [°].

**Table 4.**  Anisotropic displacement parameters (Å2x 103)

**Table 5.**  Hydrogen coordinates ( x 104) and isotropic displacement parameters (Å2x 10 3)

**Supporting Figure 5.** Views of [Fe(NCTPP)]2 (**6**) with atomic labelling Scheme. Thermal ellipsoids are scales to 35% probability level.

Table 1. Crystal data and structure refinement for h200m.

Identification code h200m

Empirical formula C96 H72 Fe2 N8 O2

Formula weight 1481.32

Temperature 293(2) K

Wavelength 0.71073 Å

Crystal system Orthorhombic

Space group Pbca

Unit cell dimensions a = 15.867(5) Å = 90°.

b = 20.697(6) Å = 90°.

c = 22.397(7) Å  = 90°.

Volume 7355(4) Å3

Z 4

Density (calculated) 1.338 Mg/m3

Absorption coefficient 0.454 mm-1

F(000) 3088

Crystal size 0.36 x 0.27 x 0.08 mm3

Theta range for data collection 1.82 to 27.67°.

Index ranges -15<=h<=20, -23<=k<=26, -29<=l<=29

Reflections collected 45278

Independent reflections 8528 [R(int) = 0.1119]

Completeness to theta = 27.67° 99.3 %

Absorption correction Empirical Used SADABS

Max. and min. transmission 0.9486 and 0.7211

Refinement method Full-matrix least-squares on F2

Data / restraints / parameters 8528 / 0 / 462

Goodness-of-fit on F2 0.983

Final R indices [I>2sigma(I)] R1 = 0.0756, wR2 = 0.1546

R indices (all data) R1 = 0.2719, wR2 = 0.1788

Largest diff. peak and hole 0.782 and -0.651 e.Å-3

Table 2. Atomic coordinates ( x 104) and equivalent isotropic displacement parameters (Å2x 103)

for h200m. U(eq) is defined as one third of the trace of the orthogonalized Uij tensor.

________________________________________________________________________________

x y z U(eq)

________________________________________________________________________________

Fe(1) 9519(1) 236(1) 6042(1) 73(1)

N(1) 9811(3) -551(2) 6603(2) 61(1)

N(2) 9283(3) 766(2) 6780(2) 60(1)

N(3) 8538(3) 742(2) 5620(2) 63(1)

N(4) 9504(3) -665(2) 4465(2) 53(1)

C(1) 9958(4) -1200(3) 6473(3) 64(2)

C(2) 10255(4) -1526(3) 6996(3) 80(2)

C(3) 10322(4) -1086(3) 7429(3) 77(2)

C(4) 10038(4) -477(3) 7189(3) 64(2)

C(5) 10010(4) 105(3) 7527(3) 66(2)

C(6) 9646(4) 681(3) 7330(3) 67(2)

C(7) 9521(4) 1243(3) 7687(3) 75(2)

C(8) 9066(4) 1661(3) 7375(3) 76(2)

C(9) 8899(4) 1361(3) 6805(3) 65(2)

C(10) 8395(4) 1617(3) 6359(3) 65(2)

C(11) 8196(4) 1317(3) 5820(3) 66(2)

C(12) 7616(4) 1563(3) 5394(3) 79(2)

C(13) 7614(4) 1147(3) 4931(3) 72(2)

C(14) 8180(4) 642(3) 5052(3) 60(2)

C(15) 8420(4) 147(3) 4663(3) 58(2)

C(16) 8947(4) -363(3) 4863(3) 61(2)

C(17) 8991(4) -598(3) 5445(3) 61(2)

C(18) 9527(4) -1129(3) 5439(3) 55(2)

C(19) 9790(4) -1163(3) 4839(3) 80(2)

C(20) 9858(4) -1488(3) 5923(3) 63(2)

C(21) 8012(5) 2275(4) 6456(4) 81(2)

C(22) 7379(7) 2363(5) 6829(4) 142(4)

C(23) 7026(9) 2967(7) 6905(5) 184(6)

C(24) 7309(9) 3466(6) 6633(5) 154(6)

C(25) 7946(7) 3416(5) 6224(5) 155(4)

C(26) 8304(5) 2806(5) 6153(4) 138(3)

C(27) 8079(4) 131(3) 4043(3) 66(2)

C(28) 8056(4) 654(3) 3673(3) 78(2)

C(29) 7694(5) 588(4) 3110(3) 101(3)

C(30) 7371(5) 29(5) 2928(4) 111(3)

C(31) 7400(5) -498(4) 3291(4) 130(3)

C(32) 7760(5) -445(4) 3842(3) 101(2)

C(33) 10111(5) -2167(3) 5810(3) 68(2)

C(34) 9574(6) -2605(4) 5625(4) 147(4)

C(35) 9790(6) -3245(4) 5515(5) 158(4)

C(36) 10559(7) -3449(4) 5576(4) 107(3)

C(37) 11131(6) -3024(4) 5732(4) 154(4)

C(38) 10894(6) -2385(4) 5858(4) 139(4)

C(39) 10333(5) 73(3) 8146(3) 72(2)

C(40) 11126(5) 310(3) 8263(3) 94(2)

C(41) 11452(6) 258(4) 8836(4) 117(3)

C(42) 10988(8) -8(4) 9274(4) 125(4)

C(43) 10207(6) -237(4) 9167(4) 117(3)

C(44) 9892(5) -197(3) 8594(3) 94(2)

O(1) 1146(10) 2025(6) 6651(5) 376(6)

C(45) 564(9) 2575(7) 6489(6) 290(7)

C(46) 1095(10) 3063(7) 6241(7) 290(7)

C(47) 1669(12) 2659(9) 5999(7) 344(9)

C(48) 1907(12) 2313(8) 6431(8) 355(10)

________________________________________________________________________________

Table 3. Bond lengths [Å] and angles [°] for h200m.

_____________________________________________________

Fe(1)-N(2) 2.017(5)

Fe(1)-N(3) 2.101(5)

Fe(1)-N(1) 2.110(4)

Fe(1)-N(4)#1 2.117(5)

Fe(1)-C(17) 2.341(5)

N(1)-C(4) 1.370(6)

N(1)-C(1) 1.394(6)

N(2)-C(6) 1.372(6)

N(2)-C(9) 1.376(6)

N(3)-C(11) 1.380(6)

N(3)-C(14) 1.410(6)

N(4)-C(19) 1.404(7)

N(4)-C(16) 1.403(6)

N(4)-Fe(1)#1 2.117(5)

C(1)-C(20) 1.377(7)

C(1)-C(2) 1.432(7)

C(2)-C(3) 1.335(7)

C(3)-C(4) 1.442(7)

C(4)-C(5) 1.424(7)

C(5)-C(6) 1.396(7)

C(5)-C(39) 1.482(8)

C(6)-C(7) 1.424(7)

C(7)-C(8) 1.326(7)

C(8)-C(9) 1.443(7)

C(9)-C(10) 1.386(7)

C(10)-C(11) 1.394(7)

C(10)-C(21) 1.506(8)

C(11)-C(12) 1.420(7)

C(12)-C(13) 1.347(7)

C(13)-C(14) 1.405(7)

C(14)-C(15) 1.397(7)

C(15)-C(16) 1.420(7)

C(15)-C(27) 1.490(7)

C(16)-C(17) 1.393(7)

C(17)-C(18) 1.390(7)

C(18)-C(19) 1.409(7)

C(18)-C(20) 1.415(7)

C(20)-C(33) 1.483(8)

C(21)-C(22) 1.319(9)

C(21)-C(26) 1.372(9)

C(22)-C(23) 1.381(11)

C(23)-C(24) 1.282(13)

C(24)-C(25) 1.367(13)

C(25)-C(26) 1.393(10)

C(27)-C(28) 1.365(7)

C(27)-C(32) 1.371(7)

C(28)-C(29) 1.393(8)

C(29)-C(30) 1.329(8)

C(30)-C(31) 1.360(9)

C(31)-C(32) 1.365(8)

C(33)-C(34) 1.310(8)

C(33)-C(38) 1.327(8)

C(34)-C(35) 1.391(9)

C(35)-C(36) 1.298(9)

C(36)-C(37) 1.313(9)

C(37)-C(38) 1.402(9)

C(39)-C(44) 1.345(8)

C(39)-C(40) 1.375(8)

C(40)-C(41) 1.388(9)

C(41)-C(42) 1.343(10)

C(42)-C(43) 1.349(10)

C(43)-C(44) 1.379(8)

O(1)-C(48) 1.433(17)

O(1)-C(45) 1.510(14)

C(45)-C(46) 1.428(15)

C(46)-C(47) 1.350(17)

C(47)-C(48) 1.263(19)

N(2)-Fe(1)-N(3) 87.7(2)

N(2)-Fe(1)-N(1) 88.5(2)

N(3)-Fe(1)-N(1) 144.69(18)

N(2)-Fe(1)-N(4)#1 110.32(17)

N(3)-Fe(1)-N(4)#1 95.30(18)

N(1)-Fe(1)-N(4)#1 118.83(18)

N(2)-Fe(1)-C(17) 143.4(2)

N(3)-Fe(1)-C(17) 81.1(2)

N(1)-Fe(1)-C(17) 81.3(2)

N(4)#1-Fe(1)-C(17) 105.38(18)

C(4)-N(1)-C(1) 105.3(5)

C(4)-N(1)-Fe(1) 122.8(4)

C(1)-N(1)-Fe(1) 131.1(4)

C(6)-N(2)-C(9) 105.2(5)

C(6)-N(2)-Fe(1) 126.1(4)

C(9)-N(2)-Fe(1) 127.1(4)

C(11)-N(3)-C(14) 105.1(5)

C(11)-N(3)-Fe(1) 125.1(4)

C(14)-N(3)-Fe(1) 129.1(4)

C(19)-N(4)-C(16) 98.7(5)

C(19)-N(4)-Fe(1)#1 113.0(4)

C(16)-N(4)-Fe(1)#1 127.9(4)

C(20)-C(1)-N(1) 125.8(6)

C(20)-C(1)-C(2) 124.5(6)

N(1)-C(1)-C(2) 109.7(5)

C(3)-C(2)-C(1) 107.5(6)

C(2)-C(3)-C(4) 107.4(6)

N(1)-C(4)-C(5) 126.5(6)

N(1)-C(4)-C(3) 110.0(6)

C(5)-C(4)-C(3) 123.5(6)

C(6)-C(5)-C(4) 124.7(6)

C(6)-C(5)-C(39) 118.5(6)

C(4)-C(5)-C(39) 116.6(6)

N(2)-C(6)-C(5) 124.5(6)

N(2)-C(6)-C(7) 110.0(6)

C(5)-C(6)-C(7) 125.3(7)

C(8)-C(7)-C(6) 108.2(6)

C(7)-C(8)-C(9) 106.5(6)

N(2)-C(9)-C(10) 124.6(6)

N(2)-C(9)-C(8) 110.0(6)

C(10)-C(9)-C(8) 125.4(7)

C(9)-C(10)-C(11) 125.8(6)

C(9)-C(10)-C(21) 118.3(6)

C(11)-C(10)-C(21) 115.9(6)

N(3)-C(11)-C(10) 125.1(6)

N(3)-C(11)-C(12) 110.2(6)

C(10)-C(11)-C(12) 124.6(7)

C(13)-C(12)-C(11) 106.8(6)

C(12)-C(13)-C(14) 109.0(6)

C(15)-C(14)-C(13) 126.9(6)

C(15)-C(14)-N(3) 124.1(6)

C(13)-C(14)-N(3) 108.8(6)

C(14)-C(15)-C(16) 120.6(6)

C(14)-C(15)-C(27) 119.9(6)

C(16)-C(15)-C(27) 119.4(6)

C(17)-C(16)-N(4) 114.0(5)

C(17)-C(16)-C(15) 125.8(6)

N(4)-C(16)-C(15) 120.1(6)

C(18)-C(17)-C(16) 107.3(5)

C(18)-C(17)-Fe(1) 111.7(4)

C(16)-C(17)-Fe(1) 107.1(4)

C(17)-C(18)-C(19) 103.3(5)

C(17)-C(18)-C(20) 129.4(6)

C(19)-C(18)-C(20) 126.5(6)

N(4)-C(19)-C(18) 115.9(6)

C(1)-C(20)-C(18) 120.0(6)

C(1)-C(20)-C(33) 122.1(6)

C(18)-C(20)-C(33) 117.8(6)

C(22)-C(21)-C(26) 117.3(8)

C(22)-C(21)-C(10) 121.6(9)

C(26)-C(21)-C(10) 121.2(8)

C(21)-C(22)-C(23) 120.9(10)

C(24)-C(23)-C(22) 121.9(14)

C(23)-C(24)-C(25) 121.1(15)

C(24)-C(25)-C(26) 116.6(12)

C(21)-C(26)-C(25) 122.2(9)

C(28)-C(27)-C(32) 118.7(6)

C(28)-C(27)-C(15) 123.9(6)

C(32)-C(27)-C(15) 117.4(7)

C(27)-C(28)-C(29) 118.9(7)

C(30)-C(29)-C(28) 121.5(8)

C(29)-C(30)-C(31) 120.1(9)

C(30)-C(31)-C(32) 119.3(8)

C(31)-C(32)-C(27) 121.4(7)

C(34)-C(33)-C(38) 113.5(7)

C(34)-C(33)-C(20) 122.2(8)

C(38)-C(33)-C(20) 124.2(7)

C(33)-C(34)-C(35) 123.7(8)

C(36)-C(35)-C(34) 121.5(9)

C(35)-C(36)-C(37) 117.4(9)

C(36)-C(37)-C(38) 120.0(9)

C(33)-C(38)-C(37) 123.7(8)

C(44)-C(39)-C(40) 118.8(7)

C(44)-C(39)-C(5) 122.5(7)

C(40)-C(39)-C(5) 118.6(7)

C(39)-C(40)-C(41) 119.3(8)

C(42)-C(41)-C(40) 120.1(10)

C(41)-C(42)-C(43) 121.2(11)

C(42)-C(43)-C(44) 118.5(9)

C(39)-C(44)-C(43) 122.0(8)

C(48)-O(1)-C(45) 96.9(13)

C(46)-C(45)-O(1) 105.4(12)

C(47)-C(46)-C(45) 96.7(13)

C(48)-C(47)-C(46) 104.2(16)

C(47)-C(48)-O(1) 104.4(17)

_____________________________________________________________

Symmetry transformations used to generate equivalent atoms:

#1 -x+2,-y,-z+1

Table 4. Anisotropic displacement parameters (Å2x 103) for h200m. The anisotropic

displacement factor exponent takes the form: -22[ h2 a*2U11 + ... + 2 h k a* b* U12 ]

______________________________________________________________________________

U11 U22 U33 U23 U13 U12

______________________________________________________________________________

Fe(1) 93(1) 69(1) 58(1) -1(1) -5(1) 16(1)

N(1) 76(4) 53(3) 53(3) -2(3) -2(3) -6(3)

N(2) 67(4) 56(3) 58(4) 4(3) -2(3) 1(3)

N(3) 58(4) 64(4) 66(4) 1(3) 4(3) -2(3)

N(4) 48(3) 41(3) 70(3) -5(3) 4(3) 9(3)

C(1) 82(5) 51(4) 59(4) 1(4) -9(4) -2(4)

C(2) 101(6) 58(4) 81(5) 11(4) -16(5) 7(4)

C(3) 100(6) 63(5) 68(5) 7(4) -11(4) -1(4)

C(4) 61(5) 71(5) 59(4) 15(4) -3(4) 2(4)

C(5) 77(5) 67(5) 56(4) -3(4) 3(4) 4(4)

C(6) 79(5) 63(5) 58(4) -4(4) 0(4) -3(4)

C(7) 93(6) 69(5) 61(4) -8(4) 0(4) -4(4)

C(8) 96(6) 63(5) 70(5) -12(4) -7(4) 9(4)

C(9) 73(5) 65(5) 57(5) 1(4) 2(4) -2(4)

C(10) 68(5) 61(5) 67(5) -5(4) 6(4) 5(4)

C(11) 64(5) 58(5) 76(5) 4(4) -8(4) 8(4)

C(12) 84(6) 72(5) 82(5) -2(4) -4(5) 18(4)

C(13) 77(5) 76(5) 63(5) 2(4) -7(4) 10(4)

C(14) 58(5) 66(5) 56(5) 12(4) -6(4) 2(4)

C(15) 60(4) 60(4) 55(4) 4(4) -5(4) -2(4)

C(16) 58(5) 62(5) 63(5) 5(4) -7(4) -2(4)

C(17) 78(5) 53(4) 53(4) -4(3) -4(4) 17(4)

C(18) 66(5) 48(4) 51(4) 2(3) 0(4) -9(4)

C(19) 92(6) 72(5) 77(5) -10(4) 12(4) 7(4)

C(20) 70(5) 40(4) 77(5) 19(4) 4(4) -11(3)

C(21) 80(6) 77(6) 85(6) -4(5) -13(5) 14(5)

C(22) 172(10) 128(8) 125(8) 12(6) 39(7) 78(7)

C(23) 254(15) 182(12) 117(9) 6(9) 24(9) 126(13)

C(24) 217(16) 116(10) 128(12) -60(8) -92(11) 79(11)

C(25) 182(12) 76(8) 206(13) 1(8) -31(9) 18(8)

C(26) 144(8) 73(6) 197(10) 5(7) 5(7) 26(6)

C(27) 69(5) 56(4) 72(5) -6(4) -12(4) 6(4)

C(28) 84(5) 84(5) 65(5) 10(4) -9(4) 0(4)

C(29) 103(7) 129(8) 71(6) 17(5) -8(5) 14(6)

C(30) 113(8) 144(9) 77(6) -13(6) -30(6) 22(7)

C(31) 149(8) 117(8) 125(8) -25(6) -71(7) -17(6)

C(32) 116(7) 92(6) 94(6) 6(5) -32(5) -16(5)

C(33) 79(6) 58(5) 68(4) -2(4) -11(4) 5(5)

C(34) 125(8) 63(6) 251(10) -49(6) -58(7) 7(6)

C(35) 126(9) 62(7) 286(13) -32(7) -37(9) -4(6)

C(36) 139(9) 57(6) 126(6) -13(5) -28(7) 13(7)

C(37) 109(8) 72(6) 281(13) -32(7) 7(8) 23(6)

C(38) 88(7) 71(6) 257(12) -32(6) 7(7) -7(5)

C(39) 87(6) 76(5) 54(5) -2(4) -16(5) 3(4)

C(40) 103(7) 110(6) 70(6) -14(5) -22(5) -5(5)

C(41) 115(8) 106(7) 130(9) -25(7) -40(8) 11(6)

C(42) 200(13) 89(8) 86(7) -17(5) -65(8) 23(8)

C(43) 172(10) 117(7) 63(6) 1(5) -14(6) 8(7)

C(44) 123(7) 109(6) 50(5) 11(4) -13(5) -8(5)

______________________________________________________________________________

Table 5. Hydrogen coordinates ( x 104) and isotropic displacement parameters (Å2x 10 3)

for h200m.

________________________________________________________________________________

x y z U(eq)

________________________________________________________________________________

H(2A) 10379 -1964 7028 96

H(3A) 10516 -1159 7815 92

H(7A) 9724 1306 8072 89

H(8A) 8889 2068 7499 91

H(12A) 7298 1938 5428 95

H(13A) 7290 1188 4587 86

H(17A) 8712 -432 5776 73

H(19A) 10132 -1496 4699 96

H(22A) 7168 2014 7043 170

H(23A) 6569 3013 7162 221

H(24A) 7079 3870 6715 184

H(25A) 8130 3770 6005 185

H(26A) 8756 2758 5892 166

H(28A) 8279 1048 3794 93

H(29A) 7678 942 2855 121

H(30A) 7125 -2 2552 134

H(31A) 7177 -890 3164 156

H(32A) 7789 -807 4086 121

H(34A) 9018 -2480 5565 176

H(35A) 9374 -3534 5394 190

H(36A) 10698 -3880 5512 129

H(37A) 11694 -3145 5758 185

H(38A) 11310 -2099 5983 167

H(40A) 11440 502 7961 113

H(41A) 11992 408 8918 140

H(42A) 11210 -34 9658 150

H(43A) 9888 -419 9472 141

H(44A) 9358 -361 8516 113

H(45A) 147 2435 6199 348

H(45B) 274 2735 6840 348

H(46A) 807 3321 5942 348

H(46B) 1336 3341 6544 348

H(47A) 1418 2397 5687 413

H(47B) 2139 2899 5832 413

H(48A) 2174 2573 6737 426

H(48B) 2300 1984 6299 426

________________________________________________________________________________

**Supporting Figure 5.** Views of [Fe(NCTPP)]2 (**6**) with atomic labelling Scheme. Thermal ellipsoids are scales to 35% probability level.

Crystal Structure Report for [Fe(NCOTPP)]2(OH)•Na(THF)2 **(7)**

**Table 1.** Crystal data and structure refinement.

**Table 2.**  Atomic coordinates ( x 104) and equivalent isotropic displacement parameters (Å2x 103).

**Table 3.**  Bond lengths [Å] and angles [°].

**Table 4.**  Anisotropic displacement parameters (Å2x 103)

**Table 5.**  Hydrogen coordinates ( x 104) and isotropic displacement parameters (Å2x 10 3)

**Supporting Figure 6.** Views of [Fe(NCOTPP)]2(OH)•Na(THF)2 **(7)**) with atomic labelling Scheme. Thermal ellipsoids are scales to 35% probability level.

Table 1. Crystal data and structure refinement for h313m.

Identification code h313m

Empirical formula C108 H95 Fe2 N8 Na O8

Formula weight 1767.61

Temperature 293(2) K

Wavelength 0.71073 Å

Crystal system Monoclinic

Space group C2/c

Unit cell dimensions a = 28.473(3) Å = 90°.

b = 18.7702(18) Å = 104.922(2)°.

c = 16.8963(16) Å  = 90°.

Volume 8725.6(14) Å3

Z 4

Density (calculated) 1.346 Mg/m3

Absorption coefficient 0.404 mm-1

F(000) 3704

Crystal size 0.38 x 0.14 x 0.10 mm3

Theta range for data collection 1.31 to 25.02°.

Index ranges -33<=h<=23, -22<=k<=22, -19<=l<=20

Reflections collected 24722

Independent reflections 7695 [R(int) = 0.0936]

Completeness to theta = 25.02° 99.8 %

Absorption correction Empirical Used SADABS

Max. and min. transmission 0.9486 and 0.6301

Refinement method Full-matrix least-squares on F2

Data / restraints / parameters 7695 / 0 / 578

Goodness-of-fit on F2 0.924

Final R indices [I>2sigma(I)] R1 = 0.0702, wR2 = 0.1815

R indices (all data) R1 = 0.1538, wR2 = 0.2238

Largest diff. peak and hole 1.392 and -0.822 e.Å-3

Table 2. Atomic coordinates ( x 104) and equivalent isotropic displacement parameters (Å2x 103)

for h313m. U(eq) is defined as one third of the trace of the orthogonalized Uij tensor.

________________________________________________________________________________

x y z U(eq)

________________________________________________________________________________

Fe(1) 9893(1) 6895(1) 3531(1) 34(1)

O(1) 10000 6565(3) 2500 44(1)

O(2) 9922(2) 6348(2) 4529(2) 44(1)

N(1) 10611(2) 7182(2) 4113(3) 35(1)

N(2) 9697(2) 7929(2) 3505(3) 33(1)

N(3) 9162(2) 6590(2) 3208(3) 35(1)

N(4) 10035(2) 4704(3) 3493(3) 40(1)

C(1) 10998(2) 6733(3) 4469(3) 37(1)

C(2) 11399(2) 7144(3) 4911(3) 40(2)

C(3) 11269(2) 7833(3) 4817(3) 38(1)

C(4) 10780(2) 7859(3) 4314(3) 35(1)

C(5) 10505(2) 8485(3) 4065(3) 32(1)

C(6) 10015(2) 8511(3) 3661(3) 32(1)

C(7) 9745(2) 9140(3) 3359(3) 32(1)

C(8) 9278(2) 8950(3) 3033(3) 34(1)

C(9) 9242(2) 8190(3) 3127(3) 32(1)

C(10) 8809(2) 7799(3) 2912(3) 33(1)

C(11) 8770(2) 7045(3) 2997(3) 36(1)

C(12) 8324(2) 6658(3) 2881(3) 40(1)

C(13) 8450(2) 5964(3) 3024(3) 41(2)

C(14) 8967(2) 5912(3) 3217(3) 36(1)

C(15) 9244(2) 5270(3) 3351(3) 36(1)

C(16) 9745(2) 5271(3) 3671(3) 37(1)

C(17) 10058(2) 5797(3) 4139(3) 37(1)

C(18) 10544(2) 5593(3) 4169(3) 35(1)

C(19) 10489(2) 4906(3) 3783(3) 39(1)

C(20) 10982(2) 5975(3) 4426(3) 37(1)

C(21) 10767(2) 9177(3) 4270(3) 35(1)

C(22) 11181(2) 9330(3) 4009(3) 37(1)

C(23) 11435(2) 9962(3) 4212(3) 43(2)

C(24) 11279(2) 10463(3) 4692(4) 47(2)

C(25) 10870(2) 10319(3) 4959(3) 46(2)

C(26) 10619(2) 9690(3) 4756(3) 41(2)

C(27) 8346(2) 8191(3) 2547(3) 34(1)

C(28) 8090(2) 8053(3) 1745(3) 40(1)

C(29) 7672(2) 8430(4) 1381(4) 51(2)

C(30) 7496(2) 8931(4) 1808(5) 60(2)

C(31) 7740(2) 9075(4) 2602(5) 57(2)

C(32) 8166(2) 8702(3) 2982(4) 46(2)

C(33) 8995(2) 4585(3) 3089(3) 35(1)

C(34) 8646(2) 4512(3) 2332(3) 43(2)

C(35) 8429(2) 3858(3) 2088(4) 50(2)

C(36) 8546(2) 3270(3) 2577(4) 50(2)

C(37) 8894(3) 3332(3) 3322(4) 51(2)

C(38) 9114(2) 3973(3) 3582(3) 40(2)

C(39) 11450(2) 5572(3) 4614(3) 39(1)

C(40) 11490(2) 4937(3) 5055(3) 44(2)

C(41) 11913(3) 4533(3) 5180(4) 54(2)

C(42) 12291(3) 4765(4) 4871(4) 58(2)

C(43) 12255(2) 5388(4) 4452(4) 51(2)

C(44) 11833(2) 5790(3) 4313(4) 45(2)

Na(1) 10000 3767(2) 2500 83(1)

O(4) 10377(2) 2921(3) 3449(3) 99(2)

C(45) 10763(4) 3037(5) 4170(6) 110(3)

C(46) 10775(4) 2409(5) 4698(5) 90(3)

C(47) 10263(5) 2106(6) 4370(6) 119(4)

C(48) 10071(5) 2403(9) 3643(9) 242(11)

O(5) 1707(5) 1438(5) 2830(7) 225(6)

C(49) 1165(5) 1288(8) 2551(7) 170(6)

C(50) 997(7) 1114(6) 1731(7) 252(12)

C(51) 1543(5) 813(7) 1645(8) 152(5)

C(52) 1955(5) 1226(8) 2153(11) 234(10)

C(54) 7393(4) 2581(5) 629(7) 102(3)

O(3) 7176(5) 3112(7) 163(8) 103(4)

C(53) 7823(4) 2254(8) 507(7) 140(5)

________________________________________________________________________________

Table 3. Bond lengths [Å] and angles [°] for h313m.

_____________________________________________________

Fe(1)-O(1) 1.945(2)

Fe(1)-O(2) 1.957(4)

Fe(1)-N(2) 2.017(4)

Fe(1)-N(3) 2.093(5)

Fe(1)-N(1) 2.098(5)

Fe(1)-C(17) 2.296(5)

O(1)-Fe(1)#1 1.945(2)

O(2)-C(17) 1.336(6)

N(1)-C(4) 1.369(7)

N(1)-C(1) 1.394(7)

N(2)-C(9) 1.378(7)

N(2)-C(6) 1.398(7)

N(3)-C(11) 1.376(7)

N(3)-C(14) 1.389(7)

N(4)-C(19) 1.315(7)

N(4)-C(16) 1.427(7)

N(4)-Na(1) 2.414(6)

C(1)-C(2) 1.421(8)

C(1)-C(20) 1.424(8)

C(2)-C(3) 1.344(8)

C(3)-C(4) 1.434(8)

C(4)-C(5) 1.414(8)

C(5)-C(6) 1.389(7)

C(5)-C(21) 1.493(8)

C(6)-C(7) 1.430(7)

C(7)-C(8) 1.348(7)

C(8)-C(9) 1.441(7)

C(9)-C(10) 1.400(7)

C(10)-C(11) 1.431(8)

C(10)-C(27) 1.497(8)

C(11)-C(12) 1.433(8)

C(12)-C(13) 1.357(8)

C(13)-C(14) 1.427(8)

C(14)-C(15) 1.426(8)

C(15)-C(16) 1.389(8)

C(15)-C(33) 1.479(8)

C(16)-C(17) 1.425(8)

C(17)-C(18) 1.425(8)

C(18)-C(20) 1.406(8)

C(18)-C(19) 1.437(8)

C(19)-Na(1) 3.106(6)

C(20)-C(39) 1.495(8)

C(21)-C(22) 1.392(8)

C(21)-C(26) 1.399(7)

C(22)-C(23) 1.385(8)

C(23)-C(24) 1.388(8)

C(24)-C(25) 1.382(8)

C(25)-C(26) 1.375(8)

C(27)-C(32) 1.385(8)

C(27)-C(28) 1.388(8)

C(28)-C(29) 1.384(8)

C(29)-C(30) 1.358(9)

C(30)-C(31) 1.371(9)

C(31)-C(32) 1.405(9)

C(33)-C(38) 1.409(8)

C(33)-C(34) 1.410(8)

C(34)-C(35) 1.388(8)

C(35)-C(36) 1.367(8)

C(36)-C(37) 1.393(9)

C(37)-C(38) 1.376(8)

C(39)-C(44) 1.378(8)

C(39)-C(40) 1.395(8)

C(40)-C(41) 1.393(8)

C(41)-C(42) 1.381(9)

C(42)-C(43) 1.357(9)

C(43)-C(44) 1.387(8)

Na(1)-O(4)#1 2.315(6)

Na(1)-O(4) 2.315(6)

Na(1)-N(4)#1 2.414(6)

Na(1)-C(19)#1 3.106(6)

O(4)-C(48) 1.400(12)

O(4)-C(45) 1.430(10)

C(45)-C(46) 1.472(11)

C(46)-C(47) 1.528(13)

C(47)-C(48) 1.331(13)

O(5)-C(49) 1.522(16)

O(5)-C(52) 1.544(18)

C(49)-C(50) 1.384(14)

C(50)-C(51) 1.69(2)

C(51)-C(52) 1.483(15)

C(54)-O(3) 1.319(14)

C(54)-C(53) 1.431(14)

C(54)-C(53)#2 1.883(15)

O(3)-C(53)#2 1.325(15)

C(53)-O(3)#2 1.325(15)

C(53)-C(54)#2 1.883(15)

O(1)-Fe(1)-O(2) 128.6(2)

O(1)-Fe(1)-N(2) 113.1(2)

O(2)-Fe(1)-N(2) 118.27(17)

O(1)-Fe(1)-N(3) 93.10(13)

O(2)-Fe(1)-N(3) 84.23(17)

N(2)-Fe(1)-N(3) 90.40(18)

O(1)-Fe(1)-N(1) 98.20(13)

O(2)-Fe(1)-N(1) 84.92(17)

N(2)-Fe(1)-N(1) 89.64(18)

N(3)-Fe(1)-N(1) 167.69(17)

O(1)-Fe(1)-C(17) 93.1(2)

O(2)-Fe(1)-C(17) 35.49(17)

N(2)-Fe(1)-C(17) 153.76(19)

N(3)-Fe(1)-C(17) 86.89(19)

N(1)-Fe(1)-C(17) 87.64(19)

Fe(1)#1-O(1)-Fe(1) 142.9(3)

C(17)-O(2)-Fe(1) 86.2(3)

C(4)-N(1)-C(1) 105.5(5)

C(4)-N(1)-Fe(1) 126.2(4)

C(1)-N(1)-Fe(1) 127.8(4)

C(9)-N(2)-C(6) 107.1(4)

C(9)-N(2)-Fe(1) 125.0(4)

C(6)-N(2)-Fe(1) 125.8(4)

C(11)-N(3)-C(14) 105.8(5)

C(11)-N(3)-Fe(1) 125.6(4)

C(14)-N(3)-Fe(1) 128.4(4)

C(19)-N(4)-C(16) 105.9(5)

C(19)-N(4)-Na(1) 109.2(4)

C(16)-N(4)-Na(1) 140.1(4)

N(1)-C(1)-C(2) 109.7(5)

N(1)-C(1)-C(20) 124.8(5)

C(2)-C(1)-C(20) 125.5(5)

C(3)-C(2)-C(1) 107.5(5)

C(2)-C(3)-C(4) 107.3(5)

N(1)-C(4)-C(5) 124.5(5)

N(1)-C(4)-C(3) 109.9(5)

C(5)-C(4)-C(3) 125.6(5)

C(6)-C(5)-C(4) 125.7(5)

C(6)-C(5)-C(21) 117.5(5)

C(4)-C(5)-C(21) 116.7(5)

C(5)-C(6)-N(2) 125.8(5)

C(5)-C(6)-C(7) 125.8(5)

N(2)-C(6)-C(7) 108.4(5)

C(8)-C(7)-C(6) 108.1(5)

C(7)-C(8)-C(9) 107.9(5)

N(2)-C(9)-C(10) 126.5(5)

N(2)-C(9)-C(8) 108.6(5)

C(10)-C(9)-C(8) 124.9(5)

C(9)-C(10)-C(11) 125.3(5)

C(9)-C(10)-C(27) 118.3(5)

C(11)-C(10)-C(27) 116.4(5)

N(3)-C(11)-C(10) 124.2(5)

N(3)-C(11)-C(12) 110.6(5)

C(10)-C(11)-C(12) 125.2(5)

C(13)-C(12)-C(11) 106.1(5)

C(12)-C(13)-C(14) 108.4(5)

N(3)-C(14)-C(15) 124.7(5)

N(3)-C(14)-C(13) 109.1(5)

C(15)-C(14)-C(13) 126.2(5)

C(16)-C(15)-C(14) 122.1(5)

C(16)-C(15)-C(33) 118.8(5)

C(14)-C(15)-C(33) 119.0(5)

C(15)-C(16)-C(17) 130.6(5)

C(15)-C(16)-N(4) 120.6(5)

C(17)-C(16)-N(4) 108.7(5)

O(2)-C(17)-C(16) 126.2(5)

O(2)-C(17)-C(18) 126.3(5)

C(16)-C(17)-C(18) 107.3(5)

O(2)-C(17)-Fe(1) 58.3(3)

C(16)-C(17)-Fe(1) 110.3(4)

C(18)-C(17)-Fe(1) 110.0(4)

C(20)-C(18)-C(17) 130.5(5)

C(20)-C(18)-C(19) 125.7(5)

C(17)-C(18)-C(19) 103.5(5)

N(4)-C(19)-C(18) 114.2(5)

N(4)-C(19)-Na(1) 47.2(3)

C(18)-C(19)-Na(1) 155.8(4)

C(18)-C(20)-C(1) 122.6(5)

C(18)-C(20)-C(39) 118.6(5)

C(1)-C(20)-C(39) 118.7(5)

C(22)-C(21)-C(26) 116.8(5)

C(22)-C(21)-C(5) 121.2(5)

C(26)-C(21)-C(5) 122.0(5)

C(23)-C(22)-C(21) 122.0(5)

C(22)-C(23)-C(24) 120.1(6)

C(25)-C(24)-C(23) 118.8(6)

C(26)-C(25)-C(24) 120.9(6)

C(25)-C(26)-C(21) 121.6(6)

C(32)-C(27)-C(28) 118.3(6)

C(32)-C(27)-C(10) 121.9(5)

C(28)-C(27)-C(10) 119.8(5)

C(29)-C(28)-C(27) 120.9(6)

C(30)-C(29)-C(28) 120.8(6)

C(29)-C(30)-C(31) 119.5(6)

C(30)-C(31)-C(32) 120.7(7)

C(27)-C(32)-C(31) 119.8(6)

C(38)-C(33)-C(34) 117.6(5)

C(38)-C(33)-C(15) 120.6(5)

C(34)-C(33)-C(15) 121.9(5)

C(35)-C(34)-C(33) 120.8(6)

C(36)-C(35)-C(34) 120.9(6)

C(35)-C(36)-C(37) 119.0(6)

C(38)-C(37)-C(36) 121.4(6)

C(37)-C(38)-C(33) 120.3(6)

C(44)-C(39)-C(40) 119.2(6)

C(44)-C(39)-C(20) 121.2(5)

C(40)-C(39)-C(20) 119.4(5)

C(41)-C(40)-C(39) 119.6(6)

C(42)-C(41)-C(40) 119.9(6)

C(43)-C(42)-C(41) 120.5(6)

C(42)-C(43)-C(44) 120.3(7)

C(39)-C(44)-C(43) 120.5(6)

O(4)#1-Na(1)-O(4) 93.4(3)

O(4)#1-Na(1)-N(4) 155.4(2)

O(4)-Na(1)-N(4) 95.13(18)

O(4)#1-Na(1)-N(4)#1 95.13(18)

O(4)-Na(1)-N(4)#1 155.4(2)

N(4)-Na(1)-N(4)#1 86.6(2)

O(4)#1-Na(1)-C(19) 179.0(2)

O(4)-Na(1)-C(19) 86.79(18)

N(4)-Na(1)-C(19) 23.56(15)

N(4)#1-Na(1)-C(19) 85.14(18)

O(4)#1-Na(1)-C(19)#1 86.79(18)

O(4)-Na(1)-C(19)#1 179.0(2)

N(4)-Na(1)-C(19)#1 85.14(18)

N(4)#1-Na(1)-C(19)#1 23.56(15)

C(19)-Na(1)-C(19)#1 93.1(2)

C(48)-O(4)-C(45) 107.0(8)

C(48)-O(4)-Na(1) 115.7(7)

C(45)-O(4)-Na(1) 127.1(5)

O(4)-C(45)-C(46) 106.7(8)

C(45)-C(46)-C(47) 102.0(8)

C(48)-C(47)-C(46) 107.8(9)

C(47)-C(48)-O(4) 112.0(11)

C(49)-O(5)-C(52) 110.1(9)

C(50)-C(49)-O(5) 114.5(15)

C(49)-C(50)-C(51) 94.4(12)

C(52)-C(51)-C(50) 112.5(11)

C(51)-C(52)-O(5) 96.8(11)

O(3)-C(54)-C(53) 121.5(11)

O(3)-C(54)-C(53)#2 44.7(7)

C(53)-C(54)-C(53)#2 89.4(8)

C(54)-O(3)-C(53)#2 90.8(11)

O(3)#2-C(53)-C(54) 122.4(11)

O(3)#2-C(53)-C(54)#2 44.4(7)

C(54)-C(53)-C(54)#2 90.6(8)

_____________________________________________________________

Symmetry transformations used to generate equivalent atoms:

#1 -x+2,y,-z+1/2 #2 -x+3/2,-y+1/2,-z

Table 4. Anisotropic displacement parameters (Å2x 103) for h313m. The anisotropic

displacement factor exponent takes the form: -22[ h2 a*2U11 + ... + 2 h k a* b* U12 ]

______________________________________________________________________________

U11 U22 U33 U23 U13 U12

______________________________________________________________________________

Fe(1) 30(1) 34(1) 37(1) 2(1) 6(1) 2(1)

O(1) 44(4) 46(3) 40(3) 0 8(3) 0

O(2) 44(3) 44(2) 42(2) 0(2) 9(2) -1(2)

N(1) 34(3) 36(3) 36(3) 2(2) 7(2) 2(2)

N(2) 23(3) 35(3) 38(3) 4(2) 4(2) -1(2)

N(3) 36(3) 35(3) 34(3) 5(2) 8(2) 2(2)

N(4) 42(4) 41(3) 38(3) 7(2) 10(2) 7(3)

C(1) 30(3) 44(4) 34(3) 2(3) 6(3) 5(3)

C(2) 29(4) 44(4) 43(3) -1(3) 3(3) 7(3)

C(3) 34(4) 40(4) 37(3) 0(3) 4(3) -2(3)

C(4) 29(3) 40(4) 36(3) 1(3) 6(3) 0(3)

C(5) 28(4) 39(3) 29(3) 2(3) 9(2) 1(3)

C(6) 30(4) 36(3) 30(3) -4(3) 9(3) 4(3)

C(7) 30(4) 35(3) 34(3) 0(3) 11(3) 2(3)

C(8) 32(4) 36(3) 34(3) 4(3) 8(3) 3(3)

C(9) 24(3) 36(3) 37(3) -1(3) 8(2) 5(3)

C(10) 28(3) 35(3) 36(3) 4(3) 6(2) 3(3)

C(11) 28(3) 41(4) 36(3) 4(3) 4(2) 1(3)

C(12) 33(4) 46(4) 39(3) 5(3) 8(3) 1(3)

C(13) 34(4) 44(4) 46(3) 3(3) 11(3) -3(3)

C(14) 36(4) 35(4) 37(3) 2(3) 9(3) -3(3)

C(15) 35(4) 36(3) 39(3) 5(3) 13(3) -4(3)

C(16) 40(4) 35(3) 37(3) 6(3) 13(3) 2(3)

C(17) 40(4) 33(3) 37(3) 3(3) 7(3) 1(3)

C(18) 32(4) 37(3) 38(3) 4(3) 9(3) 1(3)

C(19) 39(4) 42(4) 37(3) 2(3) 12(3) 7(3)

C(20) 36(4) 41(4) 31(3) 5(3) 6(3) 5(3)

C(21) 31(3) 40(3) 32(3) 2(3) 2(2) 7(3)

C(22) 34(4) 41(3) 34(3) -2(3) 8(3) 1(3)

C(23) 32(4) 50(4) 47(3) -2(3) 11(3) -3(3)

C(24) 44(4) 42(4) 55(4) -9(3) 10(3) -9(3)

C(25) 53(4) 41(4) 43(3) -10(3) 12(3) 1(3)

C(26) 38(4) 43(4) 43(3) -7(3) 16(3) 1(3)

C(27) 26(3) 35(3) 41(3) 7(3) 9(3) -4(3)

C(28) 28(3) 51(4) 43(3) 6(3) 11(3) -1(3)

C(29) 28(4) 67(5) 50(4) 14(4) 0(3) -5(3)

C(30) 27(4) 56(5) 90(6) 25(4) 0(4) 1(3)

C(31) 39(4) 54(4) 81(5) 2(4) 21(4) 9(4)

C(32) 35(4) 48(4) 55(4) 0(3) 9(3) 1(3)

C(33) 31(4) 35(3) 40(3) 0(3) 12(3) -1(3)

C(34) 43(4) 47(4) 43(3) 3(3) 16(3) -4(3)

C(35) 47(4) 54(4) 47(4) -4(3) 9(3) -16(3)

C(36) 51(4) 44(4) 57(4) -7(3) 16(3) -18(3)

C(37) 69(5) 33(4) 58(4) 4(3) 28(4) -3(3)

C(38) 47(4) 39(4) 35(3) 2(3) 13(3) -3(3)

C(39) 38(4) 37(3) 39(3) -6(3) 6(3) 6(3)

C(40) 43(4) 40(4) 42(3) 0(3) 1(3) 11(3)

C(41) 57(5) 41(4) 53(4) -9(3) -7(3) 13(4)

C(42) 39(5) 56(5) 71(5) -18(4) -2(4) 8(4)

C(43) 31(4) 59(5) 62(4) -23(4) 8(3) -1(3)

C(44) 40(4) 45(4) 48(3) -11(3) 7(3) -3(3)

Na(1) 115(4) 61(3) 61(2) 0 1(2) 0

O(4) 119(6) 87(4) 77(4) 19(3) 2(4) 3(4)

C(45) 109(9) 108(8) 102(8) 35(6) 9(6) 1(7)

C(46) 114(8) 95(7) 69(5) 28(5) 38(5) 25(6)

C(47) 156(11) 124(9) 83(7) 21(6) 43(7) -29(8)

C(48) 120(12) 340(20) 246(18) 236(18) 7(11) -37(13)

O(5) 256(13) 126(7) 215(11) -85(7) -77(9) 41(8)

C(49) 170(14) 191(14) 99(9) 20(9) -55(8) -64(11)

C(50) 460(30) 84(8) 114(10) -44(7) -103(14) 117(13)

C(51) 132(12) 135(11) 156(12) 13(9) -21(9) 26(9)

C(52) 103(11) 203(15) 370(20) -223(17) 6(13) 15(10)

C(54) 124(9) 79(7) 115(8) -7(6) 52(7) -3(6)

O(3) 110(11) 98(10) 92(9) -5(8) 9(8) 17(8)

C(53) 116(10) 207(14) 93(8) -52(8) 19(7) 24(9)

______________________________________________________________________________

Table 5. Hydrogen coordinates ( x 104) and isotropic displacement parameters (Å2x 10 3)

for h313m.

________________________________________________________________________________

x y z U(eq)

________________________________________________________________________________

H(1A) 10000 6070 2500 52

H(2) 11697 6968 5211 48

H(3) 11461 8222 5036 45

H(7) 9869 9600 3384 39

H(8) 9025 9255 2790 41

H(12) 8011 6845 2737 47

H(13) 8235 5586 3000 50

H(19A) 10752 4627 3741 47

H(22) 11291 8998 3689 44

H(23) 11709 10050 4026 51

H(24) 11448 10889 4831 57

H(25) 10762 10651 5281 55

H(26) 10345 9605 4945 49

H(28) 8200 7702 1448 48

H(29) 7511 8339 838 61

H(30) 7211 9175 1562 72

H(31) 7623 9423 2893 69

H(32) 8327 8799 3523 56

H(34) 8560 4906 1992 52

H(35) 8201 3820 1586 60

H(36) 8395 2835 2413 60

H(37) 8980 2931 3651 61

H(38) 9342 4002 4086 48

H(40) 11235 4784 5263 52

H(41) 11942 4108 5472 65

H(42) 12572 4492 4950 70

H(43) 12514 5545 4258 61

H(44) 11809 6211 4015 54

H(45A) 10703 3466 4449 132

H(45B) 11070 3089 4028 132

H(46A) 10834 2545 5269 108

H(46B) 11021 2071 4638 108

H(47A) 10278 1593 4314 143

H(47B) 10066 2213 4744 143

H(48A) 9763 2621 3647 291

H(48B) 10009 2037 3225 291

H(49A) 1089 899 2876 204

H(49B) 990 1706 2660 204

H(50A) 883 1525 1387 302

H(50B) 750 746 1632 302

H(51A) 1579 317 1810 182

H(51B) 1552 839 1076 182

H(52A) 2036 1637 1865 281

H(52B) 2242 935 2360 281

________________________________________________________________________________

**Supporting Figure 6.** Views of [Fe(NCOTPP)]2(OH)•Na(THF)2 **(7)** with atomic labelling Scheme. Thermal ellipsoids are scales to 35% probability level.
